# Supplementary material for: Irradiated mesenchymal stem cells support stemness maintenance of hepatocellular carcinoma stem cells through Wnt/β-catenin signaling pathway
Source: PubMed Central journal article supplement (PMC7398068; doi:10.1186/s13578-020-00449-5), 2020-08-03
Supplement: 13578_2020_449_MOESM2_ESM.pdf [file 13578_2020_449_MOESM2_ESM.pdf]

TableS1. RT-PCR Primers for genes of Wnt family.

| Gene   | Primer Sequence (5' -> 3') |                        |
|--------|----------------------------|------------------------|
|        | Forward Primer             | Reverse Primer         |
| Wnt1   | CGATGGTGGGGTATTGTGAAC      | CCGGATTTTGGCGTATCAGAC  |
| Wnt2   | CCGAGGTCAACTCTTCATGGT      | CCTGGCACATTATCGCACAT   |
| Wnt3   | CTCGCTGGCTACCCAATTTG       | AGGCTGTCATCTATGGTGGTG  |
| Wnt4   | AGGAGGAGACGTGCGAGAAA       | CGAGTCCATGACTTCCAGGT   |
| Wnt5a  | ATTCTTGGTGGTCGCTAGGTA      | CGCCTTCTCCGATGTACTGC   |
| Wnt6   | GGCAGCCCCTTGGTTATGG        | CTCAGCCTGGCACAACCTCG   |
| Wnt7b  | CACAGAACTTTCGCAAGTGG       | GTA CTGGCACTCGTTGATGC  |
| Wnt10b | CATCCAGGCACGAATGCGA        | CGGTTGTGGGTATCAATGAAGA |
| Wnt11  | GGAGTCGGCCTTCGTGTATG       | GCCCGTAGCTGAGGTTGTC    |
